# Supplementary material
Source: publisher figshare collection journal article supplement (https://acs.figshare.com/ndownloader/files/4554901)
Supplement: Supplementary file 1 [file 4554901]

# Isaindigotone Derivatives: A New Class of Highly Selective Ligands for Telomeric G-quadruplex DNA

Jia-Heng Tan<sup>†,‡</sup>, Tian-Miao Ou<sup>†,‡</sup>, Jin-Qiang Hou<sup>‡</sup>, Yu-Jing Lu<sup>‡</sup>, Shi-Liang Huang<sup>‡</sup>, Hai-Bin Luo<sup>‡</sup>, Jian-Yong Wu<sup>§</sup>, Zhi-Shu Huang<sup>‡, \*</sup>, Kwok-Yin Wong<sup>§</sup>, Lian-Quan Gu<sup>‡, \*</sup>

\* To whom correspondence should be addressed. Phone: 8620-39943056 (Z.-S. H.); 8620-39943055 (L.-Q. G.). Fax: 8620-39943056 (Z.-S. H. and L.-Q. G.). E-mail, ceshzs@mail.sysu.edu.cn (Z.-S. H.); cesglq@mail.sysu.edu.cn (L.-Q. G.).

<sup>†</sup> These authors contributed equally to this paper.

<sup>‡</sup> School of Pharmaceutical Sciences, Sun Yat-sen University, Guangzhou 510080, China.

<sup>§</sup> Department of Applied Biology and Chemical Technology and the Central Laboratory of the Institute of Molecular Technology for Drug Discovery and Synthesis, The Hong Kong Polytechnic University, Hung Hom, Kowloon, Hong Kong, China.

## Table of Contents

|                                                                               |     |
|-------------------------------------------------------------------------------|-----|
| 1. NOE Analysis of <b>3a</b> and <b>3b</b>                                    | S2  |
| 2. Elemental Analysis Results                                                 | S4  |
| 3. UV Analysis of <b>5a</b> and <b>5b</b> in Solution                         | S5  |
| 4. FRET-melting Results                                                       | S6  |
| 5. Fluorescence Titration Results                                             | S7  |
| 6. EMSA and Thermodynamic Stability Experiments in the Absence of Added Salt  | S8  |
| 7. Molecular Modeling Studies of Interactions between Ligand and G-quadruplex | S9  |
| 8. Molecular Modeling Studies of Interactions between Ligand and Duplex DNA   | S10 |
| 9. Telomerase Inhibition.                                                     | S16 |

## 1. NOE Analysis of 3a and 3b

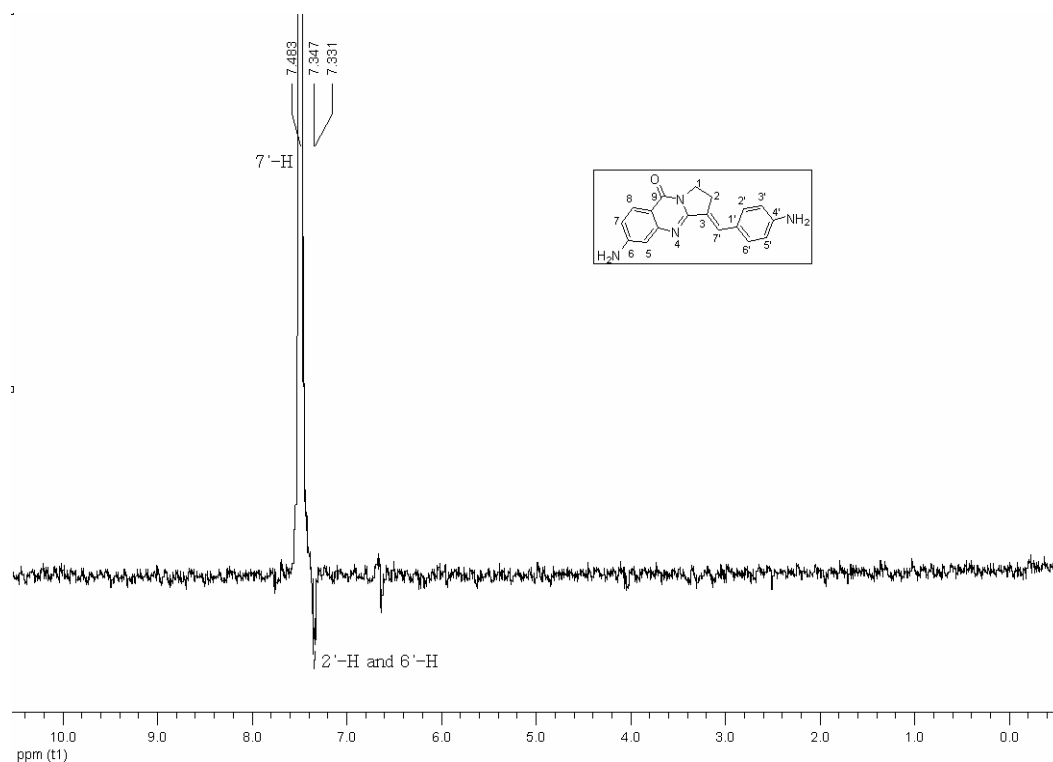

(A)

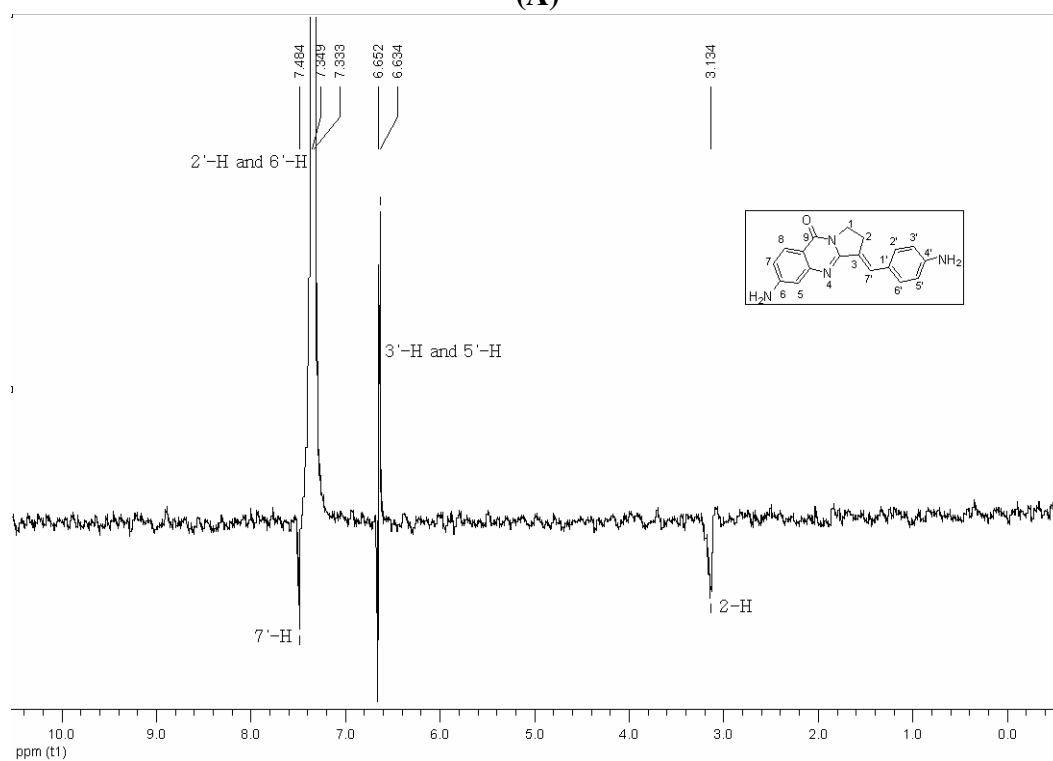

(B)

**Figure S1.** NOE analysis of **3a**. (A) Upon irradiation of the proton 7'-H, only enhancement of the equivalent protons 2'-H and 6'-H was observed. (B) Upon irradiation of 2'-H and 6'-H, signals of protons 7'-H and 2-H were simultaneously enhanced.

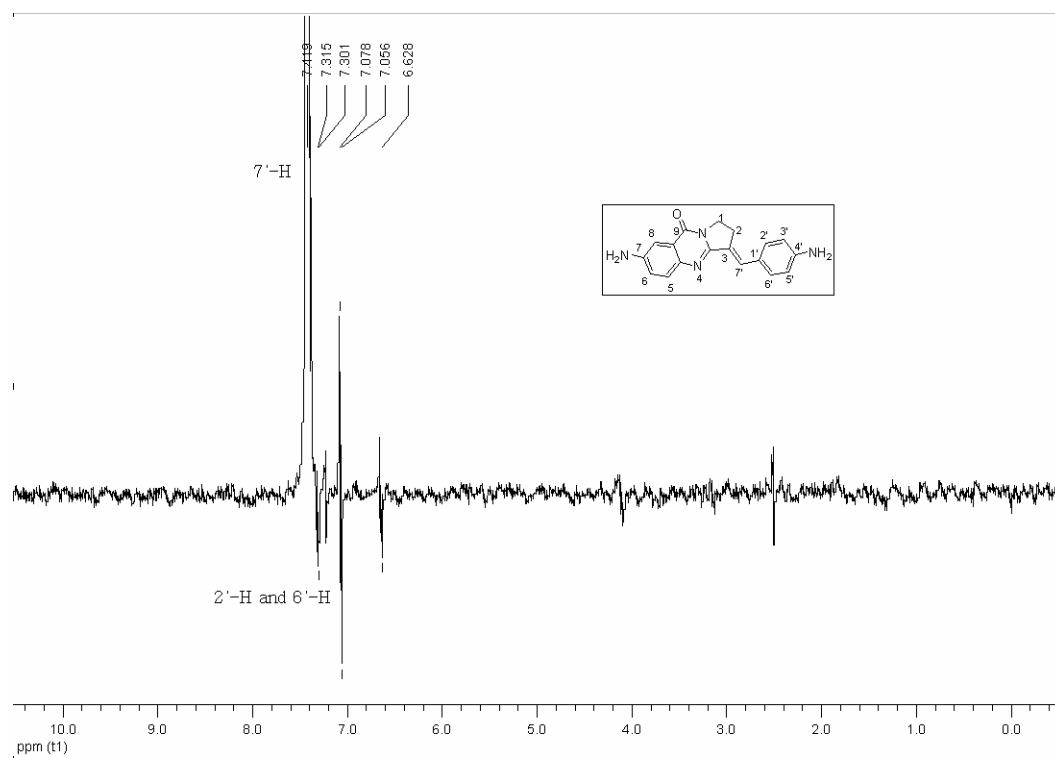

(A)

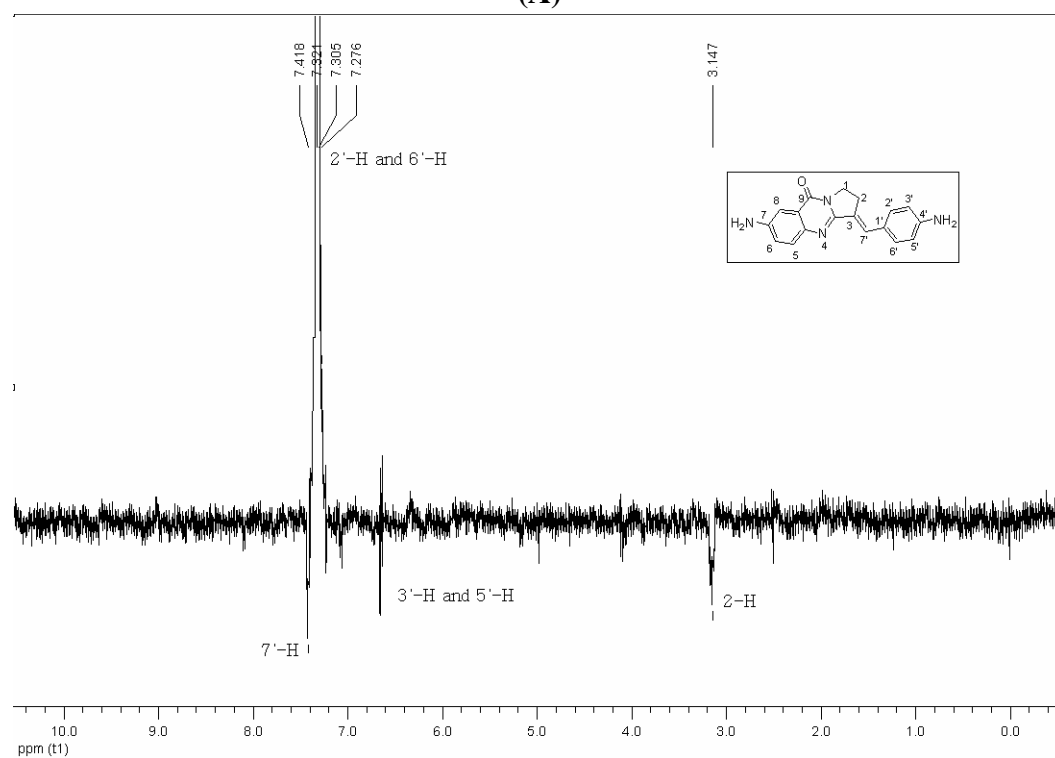

(B)

**Figure S2.** NOE analysis of **3b**. (A) Upon irradiation of the proton 7'-H, only enhancement of the equivalent protons 2'-H and 6'-H was observed. The signals of 7'-H and 5-H mostly overlapped, hence H peaks close to 5-H were simultaneously enhanced. (B) Upon irradiation of 2'-H and 6'-H, signals of protons 7'-H and 2-H were simultaneously enhanced.

## 2. Elemental Analysis Results

**Table S1.** Elemental analysis results (C, H, N)

| Compound                          | Formula                                       | Calcd     | Found     |
|-----------------------------------|-----------------------------------------------|-----------|-----------|
| <b>5a</b> (Trihydrochloride salt) | $C_{32}H_{38}N_6O_3 \cdot 3HCl \cdot 3.5H_2O$ | C, 52.86; | C, 52.83; |
|                                   |                                               | H, 6.65;  | H, 6.59;  |
|                                   |                                               | N, 11.56. | N, 11.60. |
| <b>6a</b> (Trihydrochloride salt) | $C_{34}H_{42}N_6O_3 \cdot 3HCl \cdot 5H_2O$   | C, 52.21; | C, 52.14; |
|                                   |                                               | H, 7.09;  | H, 6.95;  |
|                                   |                                               | N, 10.74. | N, 10.72. |
| <b>5b</b> (Trihydrochloride salt) | $C_{32}H_{38}N_6O_3 \cdot 3HCl \cdot 1.5H_2O$ | C, 55.61; | C, 55.85; |
|                                   |                                               | H, 6.42;  | H, 6.69;  |
|                                   |                                               | N, 12.16. | N, 11.96. |
| <b>6b</b> (Trihydrochloride salt) | $C_{34}H_{42}N_6O_3 \cdot 3HCl \cdot 4H_2O$   | C, 53.44; | C, 53.69; |
|                                   |                                               | H, 6.99;  | H, 7.13;  |
|                                   |                                               | N, 11.00. | N, 11.03. |

### 3. UV Analysis of **5a** and **5b** in Solution

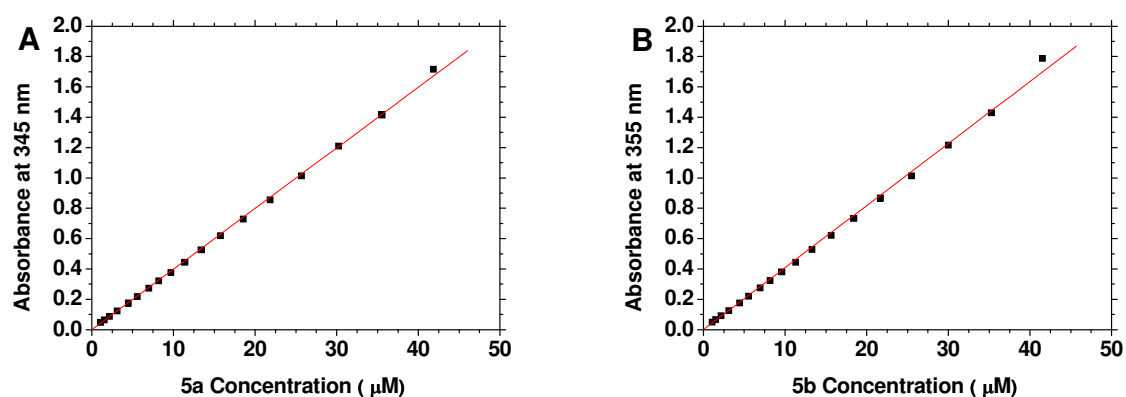

**Figure S3.** Concentration dependant UV-vis absorbance of **5a** (A) and **5b** (B). All of the spectra were collected in 10 mM Tris-HCl buffer, pH 7.2 using 1 cm path length quartz cuvette on a Shimadzu UV-2450 spectrophotometer. Concentration dependant UV-vis absorbance spectra of **5a** and **5b** showed that the variations follow the Beer-Lambert law. It was thus unlikely that the ligands do dimer or self associate in absence of quadruplex.

#### 4. FRET-melting Results

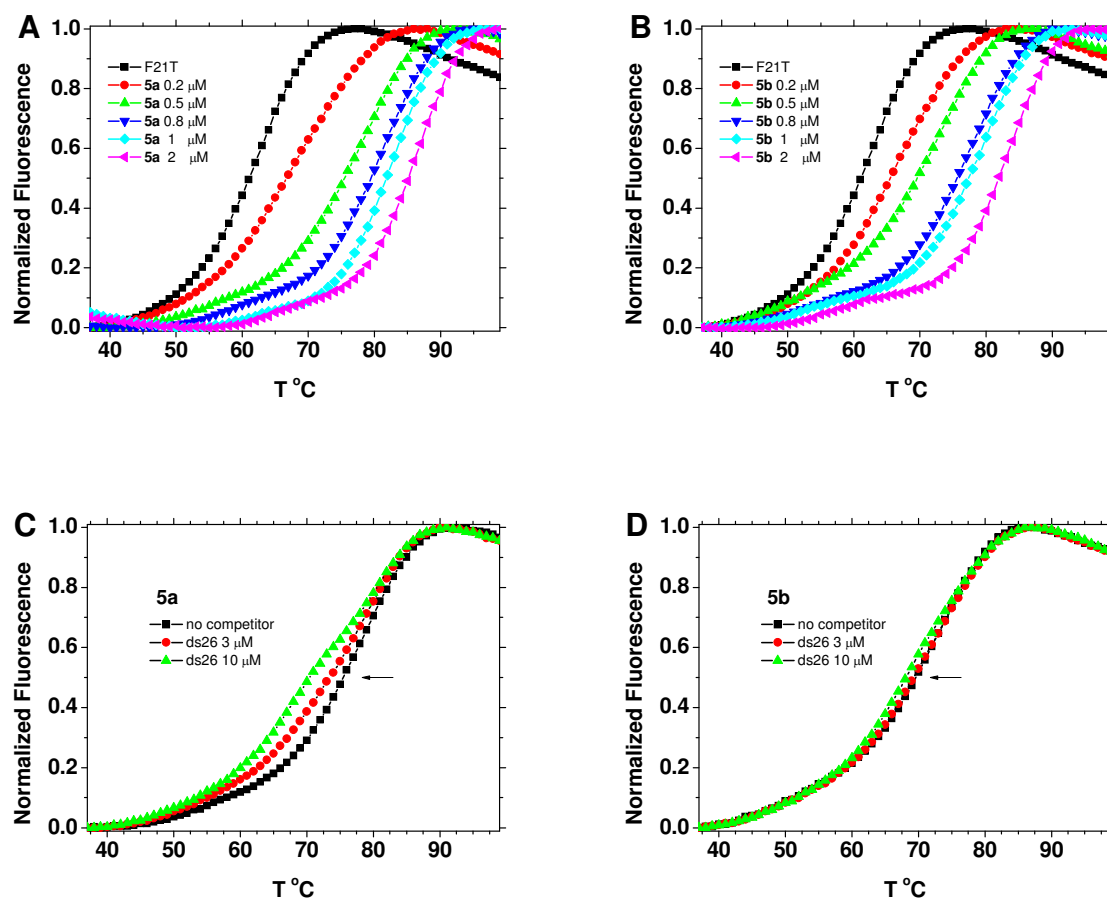

**Figure S4.** (A) and (B) Representative FRET melting profiles of F21T (0.2  $\mu$ M) with increasing concentration of **5a** or **5b**. (C) and (D) Representative competitive FRET melting profiles of F21T (0.2  $\mu$ M) in the presence of **5a** or **5b** (0.5  $\mu$ M) without (black) and with 15-fold (3  $\mu$ M, red) or 50-fold (10  $\mu$ M, green) excess of duplex DNA competitor (ds26).

## 5. Fluorescence Titration Results

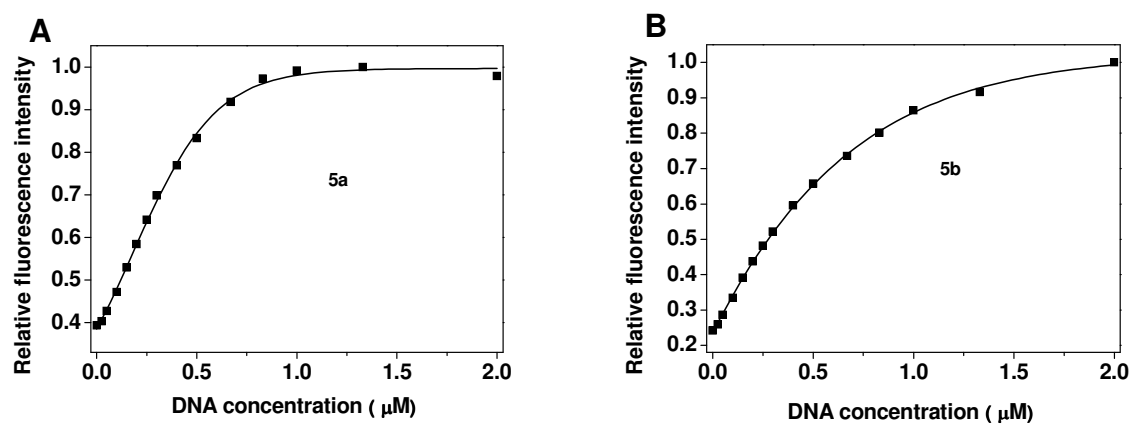

**Figure S5.** Fluorescence properties of **5a** (A) and **5b** (B) in the presence of quadruplex-forming oligonucleotide HTG21. Excitation was set at 343 nm for **5a** and 353 nm for **5b**. The changes in fluorescence intensity at 448 nm for **5a** and 450 nm for **5b** as a function of DNA concentration were shown.

## 6. EMSA and Thermodynamic Stability Experiments in the Absence of Added Salt

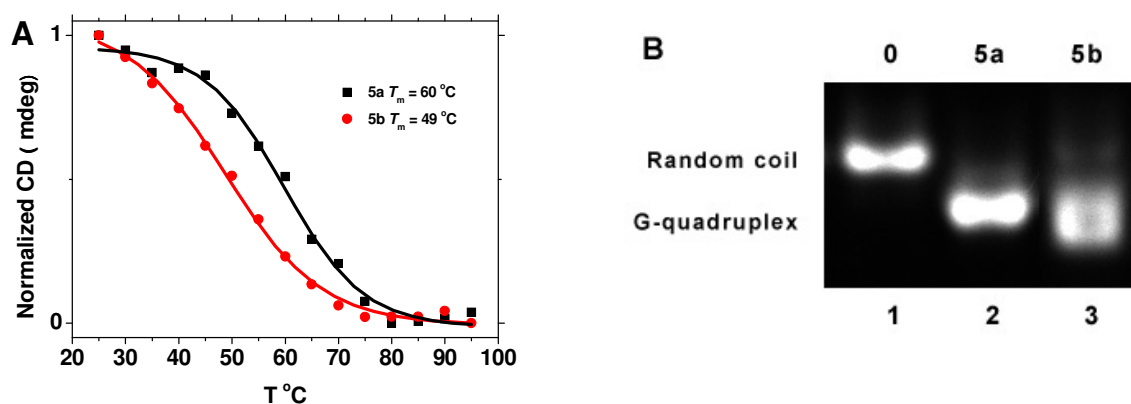

**Figure S6.** (A) CD melting profiles of HTG21 (12.5  $\mu\text{M}$ ) with 50  $\mu\text{M}$  **5a** (black) or **5b** (red) in 10 mM Tris-HCl buffer, pH 7.2, using 1 mm path length quartz cuvette. The quadruplex structures showed thermal stability with  $T_m = 60\text{ }^{\circ}\text{C}$  and  $49\text{ }^{\circ}\text{C}$  in the presence of **5a** and **5b**, respectively. Without ligand or salt, HTG21 oligonucleotide was random coil. (B) Effects of **5a** and **5b** on the formation of G-quadruplex from HTG21 oligonucleotide. End *FAM* (6-carboxyfluorescein) labeled oligonucleotides (5  $\mu\text{M}$ ) were incubated with 20  $\mu\text{M}$  **5a** or **5b** in 10 mM Tris-HCl buffer, pH 7.2 for 48 h. Free oligonucleotide and its mixture with ligand were run on a native polyacrylamide gel with 1 $\times$ TAE buffer without the addition of salt. The new high-mobility bands appeared in lane 2 and lane 3 confirmed the effects of **5a** and **5b** on formation of more compact intramolecular G-quadruplex from randomized HTG21 oligonucleotide.



## 7. Molecular Modeling Studies of Interactions between Ligand and G-quadruplex

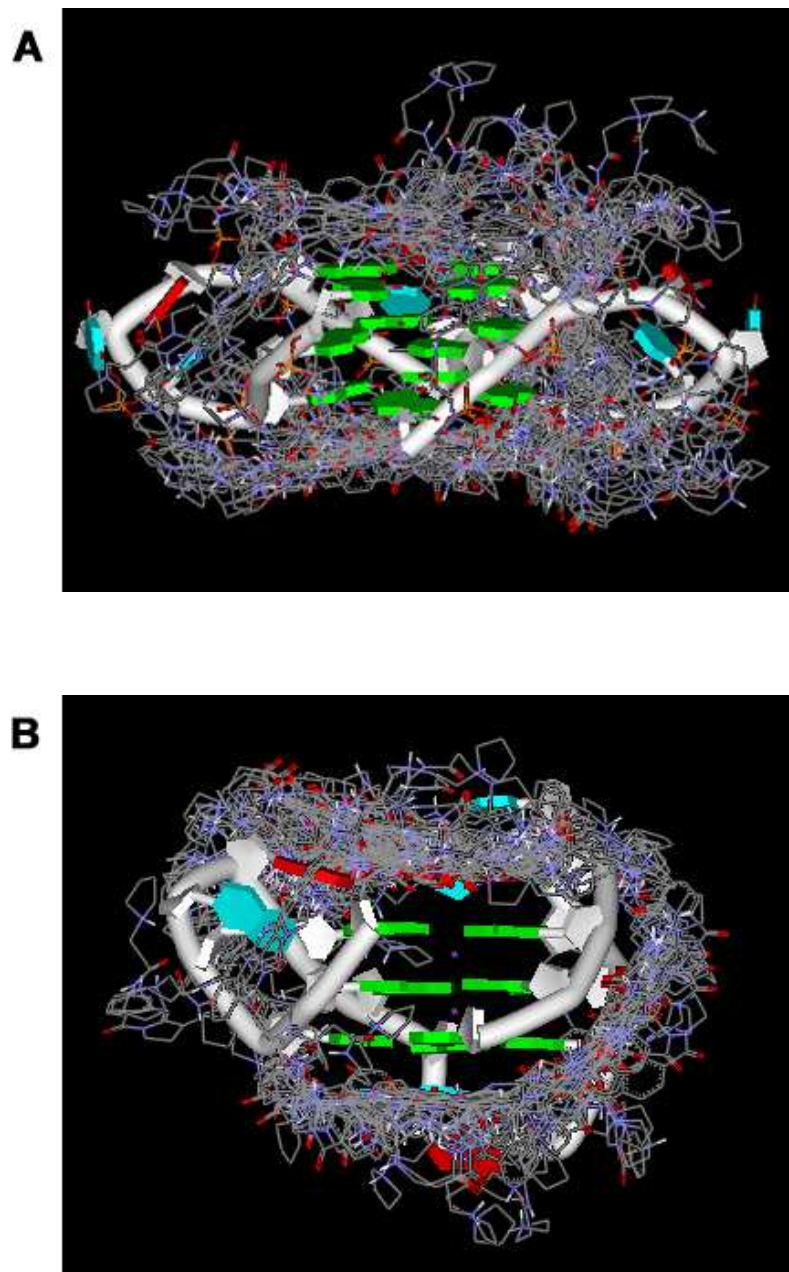

**Figure S7.** One hundred docking conformers of **5a** and G-quadruplex complexes. (A) Propeller-type G-quadruplex. (B) Hybrid-type G-quadruplex.

**Scheme S1.** Models and RMSD values of **5a**-quadruplex complex and **5b**-quadruplex complex with 1:1 stoichiometry.

| Compd.    | G4             | Binding Mode   | Model and RMSD Value                                                                 |
|-----------|----------------|----------------|--------------------------------------------------------------------------------------|
| <b>5a</b> | Propeller-type | End-stacking   | 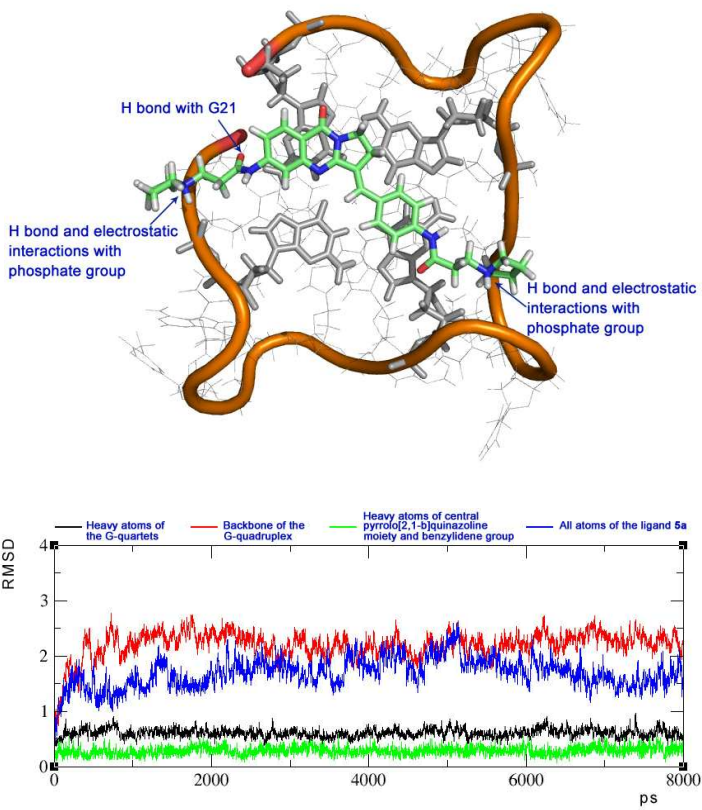  |
|           |                | Groove-binding |  |

|    |             |                |                                                                                                                                                                           |
|----|-------------|----------------|---------------------------------------------------------------------------------------------------------------------------------------------------------------------------|
| 5a | Hybrid-type | End-stacking   | 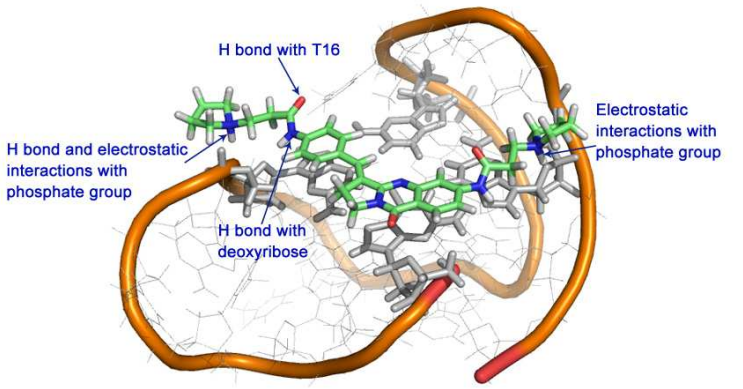     |
|    |             | Groove-binding |   |

|    |                |                |                                                                                                                                                                           |
|----|----------------|----------------|---------------------------------------------------------------------------------------------------------------------------------------------------------------------------|
| 5b | Propeller-type | End-stacking   | 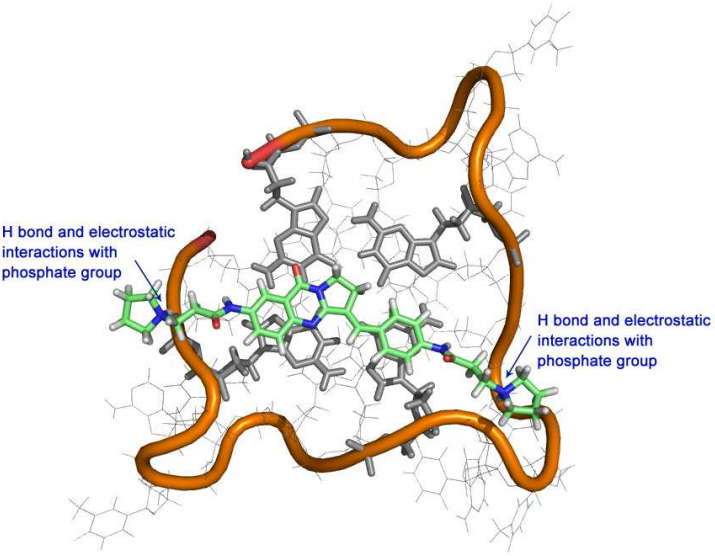     |
|    |                | Groove-binding |   |



|    |             |                |                                                                                                                                                                           |
|----|-------------|----------------|---------------------------------------------------------------------------------------------------------------------------------------------------------------------------|
| 5b | Hybrid-type | End-stacking   | 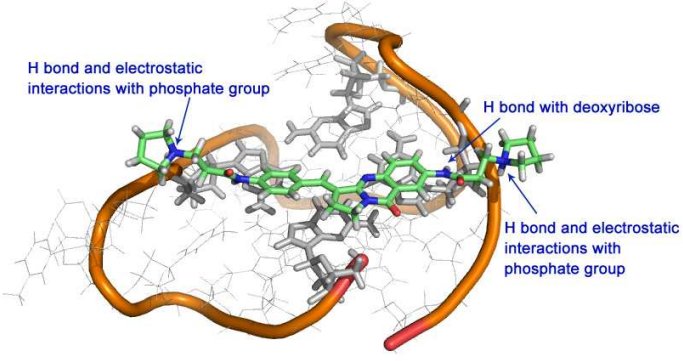     |
|    |             | Groove-binding |   |

**Scheme S2.** Models and RMSD values of **5a** and **5b** binding to the hybrid-type G-quadruplex via multiple binding modes with 4:1 stoichiometry.

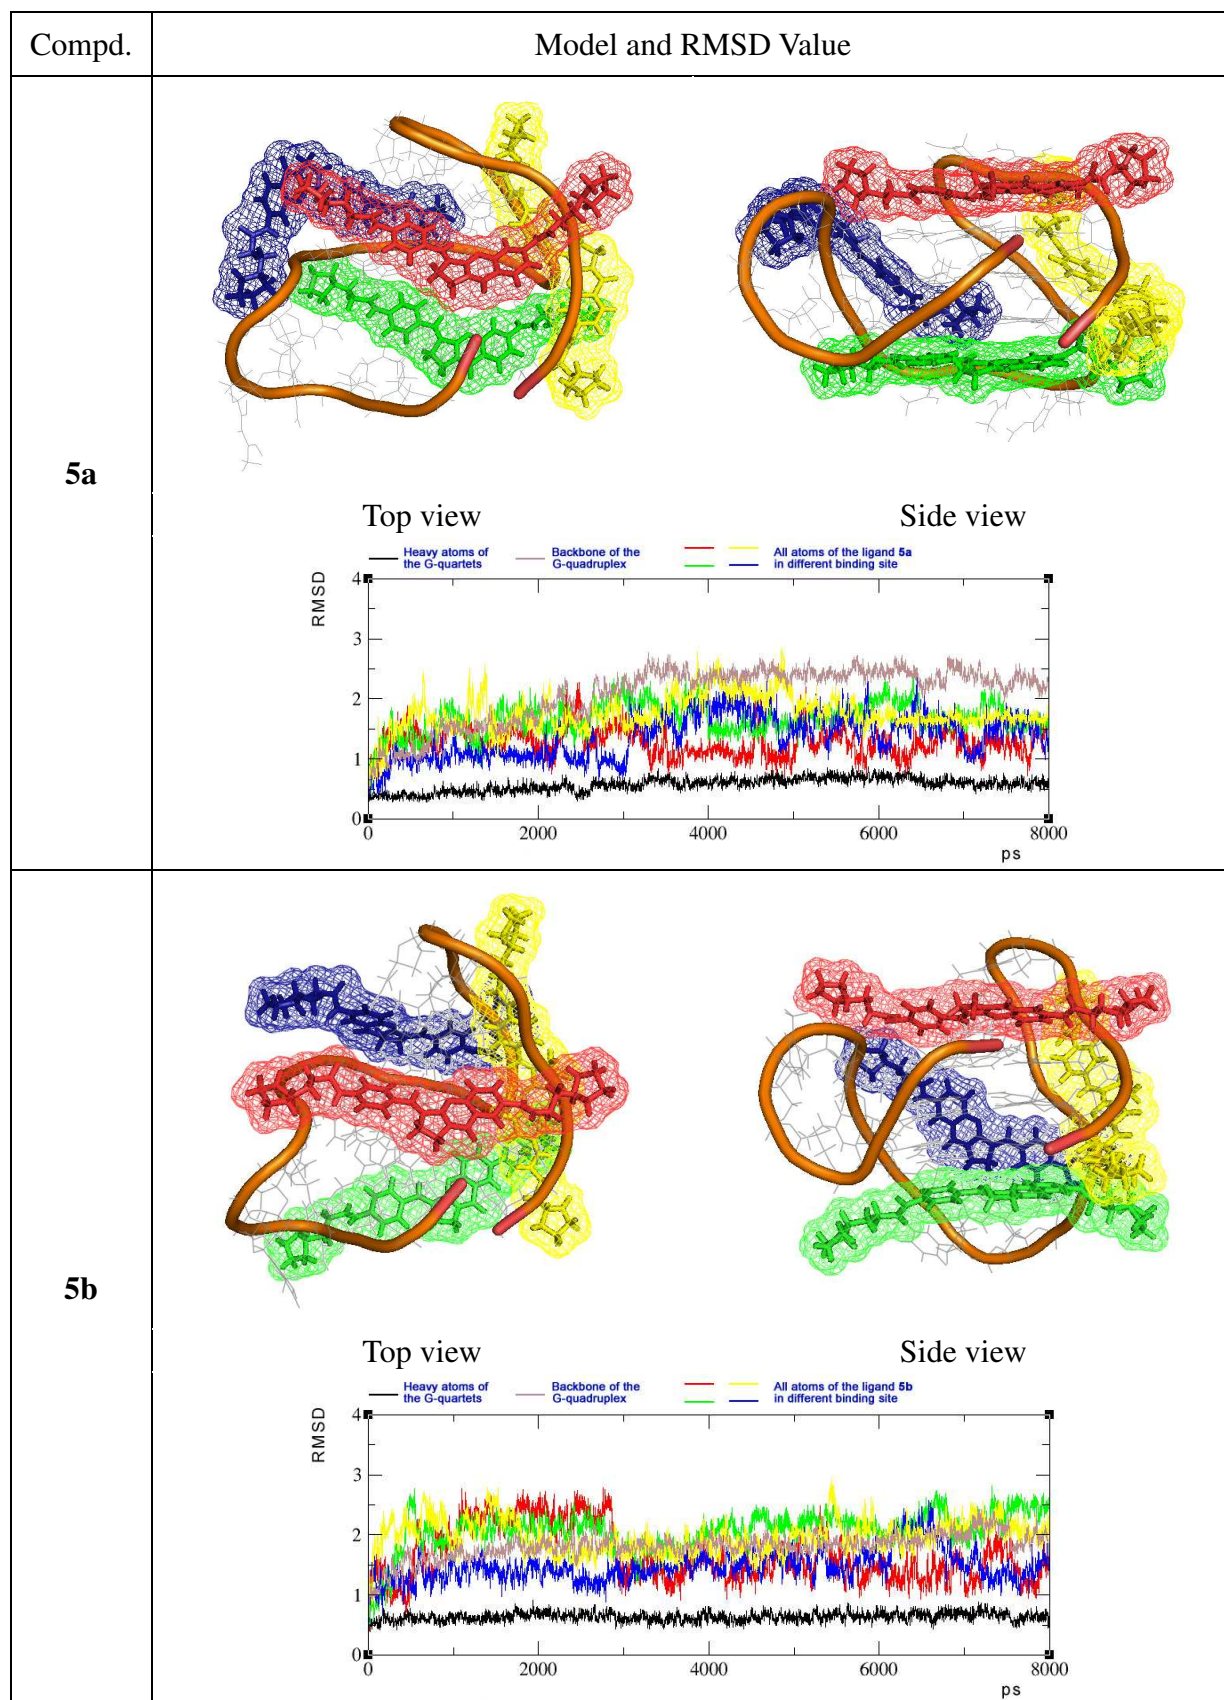

## 8. Molecular Modeling Studies of Interactions between Ligand and Duplex DNA

A self-complementary duplex DNA was built in SYBYL using Biopolymer package from the sequence d[(TA)<sub>2</sub>GC(TA)<sub>2</sub>]. The duplex model was stable in 6 ns MD runs (Figure S8A). Major and minor groove binding models were studied using Autodock package and the pseudointercalation models were built at the GC-step.

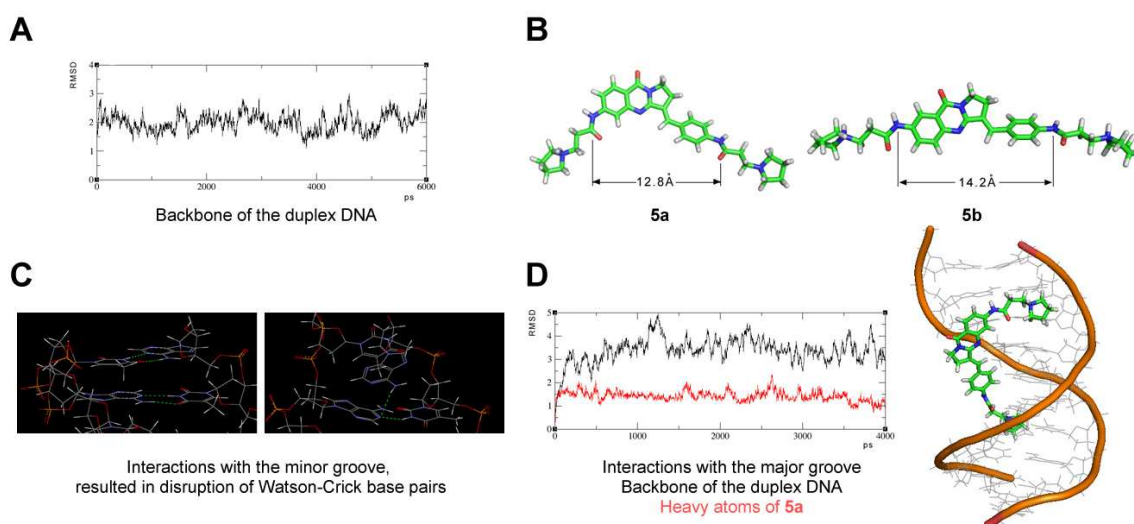

**Figure S8.** Molecular modeling studies of interactions between ligand and duplex DNA.

**Table S2.** Estimated Free Energy of Binding ( $\Delta G$ , in kcal·mol<sup>-1</sup>) in MM-PBSA Calculations

| Compd     | $\Delta G$ / kcal·mol <sup>-1</sup> (interactions with duplex DNA) |                 |              |
|-----------|--------------------------------------------------------------------|-----------------|--------------|
|           | Intercalation                                                      | Minor groove    | Major groove |
| <b>5a</b> | nr <sup>a</sup>                                                    | nr <sup>b</sup> | -31.81       |
| <b>5b</b> | nr <sup>a</sup>                                                    | nr <sup>b</sup> | -30.06       |

<sup>a</sup> nr: no result due to ligand escaping from its primary pseudointercalation site during dynamic runs. <sup>b</sup> nr: no result due to duplex DNA destabilization.

It was found that the putatively coplanar chromophore of compound **5a** and **5b** was sterically too large (about 12.8-14.2 Å) for the pseudointercalation site in the duplex DNA (about 10.7 Å) to allow significant DNA intercalation (Figure S8B). In further MD runs, ligands were found to escape from their primary pseudointercalation site accompanied by the migration towards groove region. On the other hand, the ligands were well accommodated in

the duplex DNA grooves. However, interactions with the minor groove resulted in disruption of Watson-Crick base pairs, leading to duplex DNA destabilization (Figure S8C). These results were in agreement with previous published studies.<sup>1,2</sup> Hence, interactions with the DNA pseudointercalation site and minor groove were discounted on structural stability grounds.<sup>2</sup> Estimated free energy of binding in MM-PBSA calculations was shown in Table S2.

## 9. Telomerase Inhibition

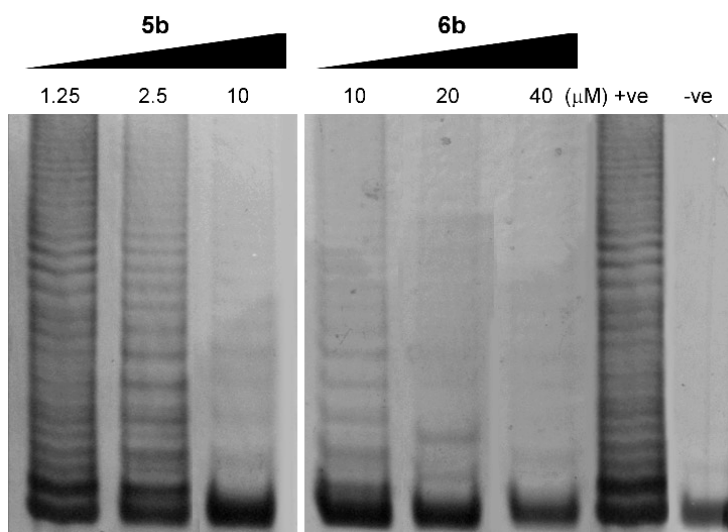

**Figure S9.** TRAP gel for ligand **5b** and **6b**.

## Reference

1. Wheelhouse, R. T.; Jennings, S. A.; Phillips, V. A.; Pletsas, D.; Murphy, P. M.; Garbett, N. C.; Chaires, J. B.; Jenkins, T. C. Design, synthesis, and evaluation of novel biarylpyrimidines: a new class of ligand for unusual nucleic acid structures. *J. Med. Chem.* **2006**, *49*, 5187-5198.
2. Drewe, W. C.; Nanjunda, R.; Gunaratnam, M.; Beltran, M.; Parkinson, G. N.; Reszka, A. P.; Wilson, W. D.; Neidle, S. Rational design of substituted diarylureas: a scaffold for binding to G-quadruplex motifs. *J. Med. Chem.* **2008**, *51*, 7751-7767.
